# Supplementary material for: IgG Anti-High Density Lipoprotein Antibodies Are Elevated in Abdominal Aortic Aneurysm and Associated with Lipid Profile and Clinical Features
Source: MDPI journal article supplement (doi:10.3390/jcm9010067), 2019-12-26
Supplement: s1 [file s1]

**Supplementary Table 1: Demographical parameters of the individuals recruited for the tissue-conditioned media experiments.**

|             | M<br>(n = 10) | T<br>(n = 10) | H<br>(n = 10) | <i>p</i> -value |
|-------------|---------------|---------------|---------------|-----------------|
| Age         | 65.0 ± 6.5    | 62.1 ± 5.8    | 58.4 ± 8.2    | 0.117           |
| Sex, n male | 10 (100)      | 10 (100)      | 7 (77.7)‡     | 0.092           |

Variables were summarized as mean ± SD or n(%). ‡ Information available from 9 subjects. Differences between groups were assessed by Chi Square for categorical variables and unpaired t- test for numerical ones.

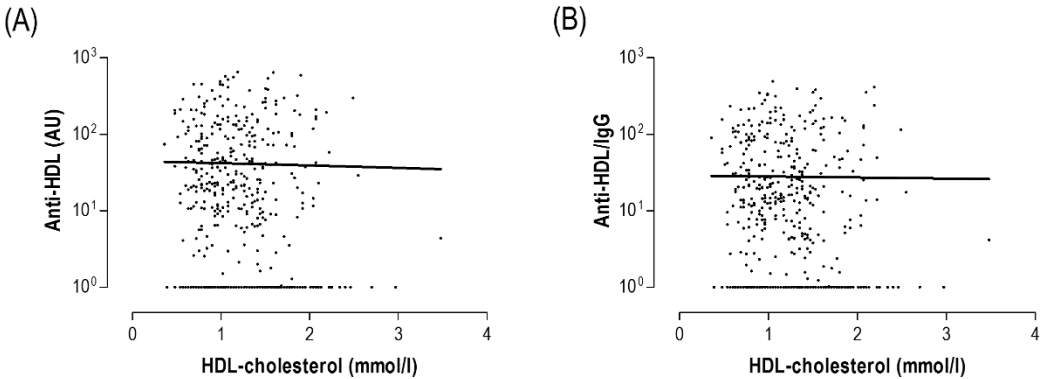

**Supplementary Figure 1: Association between anti-HDL levels and circulating HDLc.** The univariate association between anti-HDL measured as AU (A) or corrected by total IgG (B) and circulating HDL levels in AAA patients is shown.
